# Supplementary material
Source: publisher figshare collection journal article supplement (https://sage.figshare.com/ndownloader/files/22256730)
Supplement: Supplementary file 1 [file 22256730]

## APPENDIX

**Table A1.** Descriptive characteristics of the sample (percentages). Female employees, 20-54 years old (non-students)

|                                        | <b>Marginal part-time</b> |           | <b>Short part-time</b> |           | <b>Substantial part-time</b> |           | <b>Full-time employment</b> |           |
|----------------------------------------|---------------------------|-----------|------------------------|-----------|------------------------------|-----------|-----------------------------|-----------|
|                                        | Native                    | Immigrant | Native                 | Immigrant | Native                       | Immigrant | Native                      | Immigrant |
| <b>Educational level</b>               |                           |           |                        |           |                              |           |                             |           |
| Primary or less                        | 17.8                      | 20.9      | 10.9                   | 18.0      | 7.3                          | 17.1      | 5.4                         | 17.9      |
| Secondary                              | 64.2                      | 67.3      | 68.5                   | 67.3      | 66.4                         | 66.4      | 53.5                        | 62.0      |
| Tertiary                               | 18.0                      | 11.8      | 20.6                   | 14.7      | 26.3                         | 16.5      | 41.1                        | 20.1      |
| <b>Potential time in SLM (average)</b> | 21.0                      | 8.8       | 19.4                   | 8.7       | 18.5                         | 9.0       | 18.6                        | 8.8       |
| <b>Partner status</b>                  |                           |           |                        |           |                              |           |                             |           |
| Working                                | 51.6                      | 44.3      | 58.9                   | 48.1      | 64.0                         | 47.2      | 55.6                        | 43.1      |
| Non-working                            | 15.6                      | 28.1      | 11.9                   | 22.9      | 10.5                         | 22.8      | 9.6                         | 17.3      |
| Living without partner                 | 32.8                      | 27.6      | 29.2                   | 29.0      | 25.5                         | 30.0      | 34.8                        | 39.6      |
| <b>Children &lt;7 years old</b>        | 19.2                      | 34.6      | 27.6                   | 35.0      | 37.5                         | 34.7      | 21.1                        | 25.2      |
| <b>Occupational attainment</b>         |                           |           |                        |           |                              |           |                             |           |
| Unskilled manual                       | 71.2                      | 89.7      | 46.9                   | 79.7      | 33.4                         | 72.7      | 24.3                        | 63.8      |
| Skilled manual                         | 4.0                       | 3.3       | 8.3                    | 6.5       | 8.5                          | 8.0       | 7.8                         | 10.8      |
| Salariat                               | 24.8                      | 7.0       | 44.8                   | 13.8      | 58.1                         | 19.3      | 67.9                        | 25.4      |
| <b>Private sector</b>                  | 90.5                      | 98.8      | 88.2                   | 98.0      | 87.9                         | 97.8      | 66.0                        | 94.3      |
| <b>Fixed-term contract</b>             | 51.8                      | 53.3      | 35.6                   | 40.8      | 26.7                         | 38.0      | 21.6                        | 29.8      |
| <b>Ethnic origin</b>                   |                           |           |                        |           |                              |           |                             |           |
| Latin America                          |                           | 61.6      |                        | 63.7      |                              | 66.6      |                             | 66.5      |
| Eastern Europe                         |                           | 28.7      |                        | 25.6      |                              | 23.5      |                             | 22.2      |
| Africa                                 |                           | 8.6       |                        | 8.4       |                              | 7.8       |                             | 8.7       |
| Asia                                   |                           | 0.9       |                        | 2.3       |                              | 2.1       |                             | 2.6       |
| <b>Age (average)</b>                   | 40.3                      | 37.9      | 39.1                   | 37.3      | 38.7                         | 37.6      | 39.9                        | 37.5      |
| <b>Nationality</b>                     |                           |           |                        |           |                              |           |                             |           |
| Spanish                                | 99.7                      | 8.5       | 99.8                   | 10.4      | 99.9                         | 11.0      | 99.8                        | 13.5      |
| Dual (one Spanish)                     | 0.1                       | 17.2      | 0.1                    | 18.1      | 0.05                         | 19.5      | 0.1                         | 16.9      |
| Foreign                                | 0.2                       | 74.3      | 0.1                    | 71.5      | 0.05                         | 69.5      | 0.1                         | 69.6      |
| <b>Economic crisis</b>                 | 68.8                      | 66.0      | 70.9                   | 69.4      | 70.2                         | 72.0      | 73.8                        | 73.3      |
| Observations                           | 20,653                    | 3,670     | 45,801                 | 6,223     | 36,929                       | 3,643     | 352,694                     | 31,028    |
| Respondents                            | 10,085                    | 2,103     | 20,164                 | 3,288     | 17,397                       | 2,130     | 112,190                     | 12,445    |

Source: Data from the SLFS (I/2008-IV/2016), own calculations.

Note: Total number of respondents does not sum 154,747 (see Table A2), because same individuals may change of working time category across observations.

**Table A2.** Logistic regressions for panel data on the probability of transiting to different destinations. Female employees, 20-54 years old (non-students)

|                                   | BASE MODELS          |                      |                      |                      | FULL MODELS          |                      |                      |                      |
|-----------------------------------|----------------------|----------------------|----------------------|----------------------|----------------------|----------------------|----------------------|----------------------|
|                                   | Unemployment<br>(M1) | Inactivity<br>(M2)   | Full-time<br>(M3)    | Promotion<br>(M4)    | Unemployment<br>(M5) | Inactivity<br>(M6)   | Full-time<br>(M7)    | Promotion<br>(M8)    |
| <b>Native (ref.)</b>              |                      |                      |                      |                      |                      |                      |                      |                      |
| Immigrant                         | 0.444***<br>(0.110)  | -0.558***<br>(0.134) | -0.347**<br>(0.154)  | -0.079<br>(0.104)    | 0.453***<br>(0.092)  | -0.252**<br>(0.123)  | -0.402***<br>(0.155) | -0.147<br>(0.105)    |
| <b>Marginal part-time (ref.)</b>  |                      |                      |                      |                      |                      |                      |                      |                      |
| Short part-time                   | -0.806***<br>(0.043) | -0.799***<br>(0.047) | 0.515***<br>(0.046)  | -0.236***<br>(0.029) | -0.330***<br>(0.036) | -0.431***<br>(0.043) | 0.455***<br>(0.046)  | -0.300***<br>(0.030) |
| Substantial part-time             | -1.221***<br>(0.047) | -1.186***<br>(0.052) | 1.905***<br>(0.047)  | 0.237***<br>(0.029)  | -0.441***<br>(0.041) | -0.589***<br>(0.048) | 1.806***<br>(0.048)  | 0.132***<br>(0.031)  |
| Full-time employment              | -1.570***<br>(0.037) | -1.422***<br>(0.039) |                      |                      | -0.495***<br>(0.031) | -0.544***<br>(0.037) |                      |                      |
| <b>Native*Marginal PT (ref.)</b>  |                      |                      |                      |                      |                      |                      |                      |                      |
| Immigrant*Short PT                | -0.014<br>(0.103)    | 0.448***<br>(0.129)  | 0.075<br>(0.110)     | -0.170**<br>(0.071)  | -0.116<br>(0.087)    | 0.290**<br>(0.119)   | 0.110<br>(0.109)     | -0.133*<br>(0.071)   |
| Immigrant*Substantial PT          | 0.106<br>(0.121)     | 0.534***<br>(0.154)  | -0.138<br>(0.113)    | -0.229***<br>(0.076) | -0.232**<br>(0.104)  | 0.205<br>(0.143)     | -0.084<br>(0.112)    | -0.171**<br>(0.077)  |
| Immigrant*FT                      | 0.207**<br>(0.087)   | 0.740***<br>(0.109)  |                      |                      | -0.163**<br>(0.072)  | 0.342***<br>(0.099)  |                      |                      |
| <b>Age 20 -- 29 (ref.)</b>        |                      |                      |                      |                      |                      |                      |                      |                      |
| Age 30 – 39                       | -0.857***<br>(0.027) | -0.188***<br>(0.032) | -0.311***<br>(0.039) | -0.216***<br>(0.028) | -0.113***<br>(0.028) | -0.097***<br>(0.036) | -0.134***<br>(0.051) | -0.063*<br>(0.037)   |
| Age 40 – 49                       | -1.125***<br>(0.028) | -0.199***<br>(0.031) | -0.497***<br>(0.040) | -0.395***<br>(0.029) | -0.203***<br>(0.035) | -0.242***<br>(0.044) | -0.126**<br>(0.061)  | -0.063<br>(0.044)    |
| Age 50 – 54                       | -1.546***<br>(0.037) | -0.008<br>(0.037)    | -0.615***<br>(0.052) | -0.524***<br>(0.037) | -0.475***<br>(0.048) | -0.342***<br>(0.057) | 0.026<br>(0.081)     | 0.026<br>(0.059)     |
| <b>Spanish nationality (ref.)</b> |                      |                      |                      |                      |                      |                      |                      |                      |
| Dual nationality                  | 0.039<br>(0.101)     | -0.130<br>(0.123)    | 0.640***<br>(0.153)  | 0.393***<br>(0.110)  | -0.168*<br>(0.086)   | -0.245**<br>(0.114)  | 0.642***<br>(0.153)  | 0.393***<br>(0.111)  |
| Foreign nationality               | 0.083<br>(0.084)     | 0.191*<br>(0.100)    | 0.703***<br>(0.134)  | 0.505***<br>(0.095)  | -0.367***<br>(0.072) | -0.251***<br>(0.092) | 0.811***<br>(0.135)  | 0.579***<br>(0.097)  |
| <b>Economic crisis</b>            | 0.044**<br>(0.022)   | 0.367***<br>(0.025)  | -0.146***<br>(0.030) | -0.070***<br>(0.022) | 0.051***<br>(0.019)  | 0.302***<br>(0.023)  | -0.119***<br>(0.030) | -0.049**<br>(0.022)  |

|                                 |                      |                      |                      |                      |                      |                      |                      |                      |
|---------------------------------|----------------------|----------------------|----------------------|----------------------|----------------------|----------------------|----------------------|----------------------|
| <b>Primary education (ref.)</b> |                      |                      |                      |                      |                      |                      |                      |                      |
| Secondary                       |                      |                      |                      |                      | -0.263***<br>(0.027) | -0.430***<br>(0.030) | 0.033<br>(0.048)     | 0.043<br>(0.034)     |
| Tertiary                        |                      |                      |                      |                      | -0.637***<br>(0.036) | -0.658***<br>(0.042) | 0.231***<br>(0.061)  | 0.187***<br>(0.044)  |
| <b>Years on LM</b>              |                      |                      |                      |                      | -0.017***<br>(0.004) | -0.040***<br>(0.005) | 0.018***<br>(0.007)  | 0.007<br>(0.005)     |
| Years on LM squared             |                      |                      |                      |                      | 0.000***<br>(0.000)  | 0.002***<br>(0.000)  | -0.001***<br>(0.000) | -0.001***<br>(0.000) |
| <b>Partner working (ref.)</b>   |                      |                      |                      |                      |                      |                      |                      |                      |
| Partner non-working             |                      |                      |                      |                      | 0.345***<br>(0.025)  | -0.245***<br>(0.030) | 0.054<br>(0.042)     | 0.014<br>(0.031)     |
| Living without partner          |                      |                      |                      |                      | 0.253***<br>(0.020)  | -0.451***<br>(0.025) | 0.297***<br>(0.036)  | 0.185***<br>(0.026)  |
| <b>Children &lt;7 years old</b> |                      |                      |                      |                      | 0.060***<br>(0.022)  | 0.382***<br>(0.026)  | -0.063*<br>(0.036)   | -0.039<br>(0.026)    |
| <b>Unskilled manual (ref.)</b>  |                      |                      |                      |                      |                      |                      |                      |                      |
| Skilled manual                  |                      |                      |                      |                      | -0.122***<br>(0.029) | -0.232***<br>(0.035) | 0.334***<br>(0.054)  | 0.308***<br>(0.040)  |
| Salariat                        |                      |                      |                      |                      | -0.491***<br>(0.021) | -0.656***<br>(0.026) | 0.295***<br>(0.035)  | 0.246***<br>(0.026)  |
| <b>Private sector</b>           |                      |                      |                      |                      | 0.562***<br>(0.024)  | 0.202***<br>(0.027)  | -0.229***<br>(0.045) | -0.140***<br>(0.034) |
| <b>Fixed-term contract</b>      |                      |                      |                      |                      | 2.208***<br>(0.019)  | 1.342***<br>(0.022)  | 0.037<br>(0.030)     | -0.011<br>(0.022)    |
| Constant                        | -2.047***<br>(0.044) | -3.491***<br>(0.056) | -3.154***<br>(0.057) | -1.513***<br>(0.035) | -3.754***<br>(0.062) | -3.415***<br>(0.075) | -3.460***<br>(0.102) | -1.717***<br>(0.071) |
| Log likelihood                  | -92,038.4            | -68,986.5            | -40,090.8            | -51,294.7            | -82,036.9            | -65,131.2            | -39,880.0            | -51,049.5            |
| Wald chi-squared                | 5,008.2              | 1,787.6              | 2,931.0              | 840.2                | 17,861.0             | 7,711.8              | 3,157.2              | 1,287.5              |
| Observations                    | 500,641              | 500,641              | 116,919              | 116,919              | 500,641              | 500,641              | 116,919              | 116,919              |
| Respondents                     | 154,747              | 154,747              | 47,767               | 47,767               | 154,747              | 154,747              | 47,767               | 47,767               |

Source: Data from the SLFS (I/2008-IV/2016), own calculations.

\*\*\* p<0.01, \*\* p<0.05, \* p<0.1 (standard errors in parentheses).

**Table A3.** Predicted probabilities of moving to different destinations (net differences)

|                       |            | PRECARIOUSNESS               |                              | STEPPING STONE               |                              |
|-----------------------|------------|------------------------------|------------------------------|------------------------------|------------------------------|
|                       |            | To unemployment              | To inactivity                | To full-time                 | To promotion                 |
| <b>Marginal PT</b>    | Natives    | <b>.070</b><br>[.067 - .073] | <b>.052</b><br>[.049 - .054] | <b>.080</b><br>[.075 - .086] | <b>.194</b><br>[.187 - .202] |
|                       | Immigrants | <b>.097</b><br>[.086 - .107] | <b>.042</b><br>[.035 - .050] | <b>.060</b><br>[.048 - .072] | <b>.176</b><br>[.153 - .198] |
| <b>Short PT</b>       | Natives    | <b>.055</b><br>[.053 - .057] | <b>.036</b><br>[.035 - .038] | <b>.110</b><br>[.101 - .115] | <b>.157</b><br>[.152 - .162] |
|                       | Immigrants | <b>.071</b><br>[.063 - .079] | <b>.038</b><br>[.031 - .044] | <b>.090</b><br>[.076 - .105] | <b>.128</b><br>[.111 - .144] |
| <b>Substantial PT</b> | Natives    | <b>.051</b><br>[.048 - .053] | <b>.032</b><br>[.030 - .034] | <b>.245</b><br>[.238 - .252] | <b>.212</b><br>[.207 - .218] |
|                       | Immigrants | <b>.060</b><br>[.052 - .068] | <b>.031</b><br>[.024 - .037] | <b>.188</b><br>[.163 - .214] | <b>.171</b><br>[.150 - .192] |
| <b>Full-time</b>      | Natives    | <b>.049</b><br>[.048 - .050] | <b>.033</b><br>[.032 - .034] | .                            | .                            |
|                       | Immigrants | <b>.061</b><br>[.055 - .066] | <b>.036</b><br>[.031 - .040] | .                            | .                            |

*Source:* Data from the SLFS (I/2008-IV/2016), own calculations.

*Note:* Average adjusted probabilities (figure 3) calculated from full models in Table A2.

Confidence intervals in brackets.

**Table A4.** Average marginal effects after logistic regressions for panel data on the probability of transiting to different destinations (net differences). Female employees, 20-54 years old (non-students)

|                                         | PRECARIOUSNESS          |                       | STEPPING STONE       |                      |
|-----------------------------------------|-------------------------|-----------------------|----------------------|----------------------|
|                                         | To unemployment<br>(M5) | To inactivity<br>(M6) | To full-time<br>(M7) | To promotion<br>(M8) |
| <b>Native (ref.)</b>                    |                         |                       |                      |                      |
| Immigrant                               | 0.010***                | 0.001                 | -0.028***            | -0.031***            |
| <b>Marginal part-time (ref.)</b>        |                         |                       |                      |                      |
| Short part-time                         | -0.011***               | -0.007***             | 0.034***             | -0.038***            |
| Substantial part-time                   | -0.015***               | -0.009***             | 0.128***             | 0.012***             |
| Full-time employment                    | -0.017***               | -0.008***             |                      |                      |
| <b>Spanish nationality (ref.)</b>       |                         |                       |                      |                      |
| Dual nationality                        | -0.005*                 | -0.004**              | 0.046***             | 0.047***             |
| Foreign nationality                     | -0.011***               | -0.004***             | 0.058***             | 0.069***             |
| <b>Age 20 – 29 (ref.)</b>               |                         |                       |                      |                      |
| Age 30 – 39                             | -0.004***               | -0.002***             | -0.010***            | -0.007*              |
| Age 40 – 49                             | -0.006***               | -0.004***             | -0.009**             | -0.007               |
| Age 50 – 54                             | -0.015***               | -0.006***             | 0.002                | 0.003                |
| <b>Primary education or less (ref.)</b> |                         |                       |                      |                      |
| Secondary                               | -0.008***               | -0.007***             | 0.002                | 0.005                |
| Tertiary                                | -0.020***               | -0.011***             | 0.016***             | 0.022***             |
| <b>Years on LM</b>                      |                         |                       |                      |                      |
| Years on LM squared                     | -0.001***               | -0.001***             | 0.001***             | 0.001                |
|                                         | 0.000***                | 0.000***              | -0.000***            | -0.000***            |
| <b>Partner working (ref.)</b>           |                         |                       |                      |                      |
| Partner non-working                     | 0.011***                | -0.004***             | 0.004                | 0.002                |
| Living without partner                  | 0.008***                | -0.008***             | 0.021***             | 0.022***             |
| <b>Children &lt;7 years old</b>         | 0.002***                | 0.006***              | -0.004*              | -0.004               |
| <b>Unskilled manual (ref.)</b>          |                         |                       |                      |                      |
| Skilled manual                          | -0.004***               | -0.004***             | 0.024***             | 0.037***             |
| Salariat                                | -0.015***               | -0.011***             | 0.021***             | 0.030***             |
| <b>Public sector (ref.)</b>             |                         |                       |                      |                      |
| Private sector                          | 0.018***                | 0.003***              | -0.016***            | -0.017***            |
| <b>Permanent contract (ref.)</b>        |                         |                       |                      |                      |
| Fixed-term contract                     | 0.070***                | 0.023***              | 0.003                | -0.001               |
| <b>Economic recovery (ref.)</b>         |                         |                       |                      |                      |
| Economic crisis                         | 0.002***                | 0.005***              | -0.009***            | -0.006**             |
| Observations                            | 500,641                 | 500,641               | 116,919              | 116,919              |
| Respondents                             | 154,747                 | 154,747               | 47,767               | 47,767               |

Source: Data from the SLFS (I/2008-IV/2016), own calculations.

Note: Average marginal effects calculated from full models in Table A2.

\*\*\* p<0.01, \*\* p<0.05, \* p<0.1

**Table A5.** Logistic regressions for panel data on the probability of moving to different destinations (net differences). Female employees, 20-54 years old (non-students), separated by mothers/non-mothers

|                                         | To unemployment      |                      | To inactivity        |                      | To full-time work    |                      | To promotion         |                      |
|-----------------------------------------|----------------------|----------------------|----------------------|----------------------|----------------------|----------------------|----------------------|----------------------|
|                                         | Non-mother<br>(M9)   | Mother<br>(M10)      | Non-mother<br>(M11)  | Mother<br>(M12)      | Non-mother<br>(M13)  | Mother<br>(M14)      | Non-mother<br>(M15)  | Mother<br>(M16)      |
| <b>Native (ref.)</b>                    |                      |                      |                      |                      |                      |                      |                      |                      |
| Immigrant                               | 0.500***<br>(0.111)  | 0.333*<br>(0.171)    | -0.258*<br>(0.152)   | -0.194<br>(0.222)    | -0.451**<br>(0.184)  | -0.263<br>(0.288)    | -0.197<br>(0.123)    | -0.039<br>(0.200)    |
| <b>Marginal part-time (ref.)</b>        |                      |                      |                      |                      |                      |                      |                      |                      |
| Short part-time                         | -0.305***<br>(0.041) | -0.399***<br>(0.079) | -0.446***<br>(0.049) | -0.386***<br>(0.093) | 0.464***<br>(0.051)  | 0.414***<br>(0.105)  | -0.261***<br>(0.033) | -0.442***<br>(0.068) |
| Substantial part-time                   | -0.436***<br>(0.047) | -0.409***<br>(0.084) | -0.642***<br>(0.057) | -0.469***<br>(0.097) | 1.781***<br>(0.054)  | 1.829***<br>(0.106)  | 0.182***<br>(0.035)  | -0.046<br>(0.069)    |
| Full-time employment                    | -0.509***<br>(0.035) | -0.440***<br>(0.069) | -0.585***<br>(0.041) | -0.401***<br>(0.082) |                      |                      |                      |                      |
| <b>Native*Marginal part-time (ref.)</b> |                      |                      |                      |                      |                      |                      |                      |                      |
| Immigrant*Short part-time               | -0.246**<br>(0.108)  | 0.114<br>(0.152)     | 0.307**<br>(0.153)   | 0.239<br>(0.199)     | 0.166<br>(0.131)     | -0.012<br>(0.204)    | -0.053<br>(0.084)    | -0.242*<br>(0.134)   |
| Immigrant*Substantial part-time         | -0.311**<br>(0.129)  | -0.121<br>(0.177)    | 0.124<br>(0.191)     | 0.238<br>(0.228)     | 0.004<br>(0.135)     | -0.243<br>(0.207)    | -0.105<br>(0.091)    | -0.224<br>(0.143)    |
| Immigrant*Full-time employment          | -0.208**<br>(0.088)  | -0.086<br>(0.130)    | 0.361***<br>(0.127)  | 0.247<br>(0.170)     |                      |                      |                      |                      |
| Constant                                | -3.773***<br>(0.070) | -3.629***<br>(0.137) | -3.507***<br>(0.086) | -3.054***<br>(0.160) | -3.493***<br>(0.118) | -3.406***<br>(0.215) | -1.749***<br>(0.080) | -1.654***<br>(0.153) |
| Observations                            | 383,203              | 117,438              | 383,203              | 117,438              | 81,767               | 35,152               | 81,767               | 35,152               |
| Respondents                             | 122,230              | 38,577               | 122,230              | 38,577               | 34,403               | 14,519               | 34,403               | 14,519               |

Source: Data from the SLFS (I/2008-IV/2016), own calculations.

Note: Models controlled for age, nationality, period of observation, educational level, time in the Spanish labour market, labour status of the partner, children in the household, occupational attainment, sector of activity and type of contract.

\*\*\* p<0.01, \*\* p<0.05, \* p<0.1 (standard errors in parentheses).

**Table A6.** Logistic regressions for panel data on the probability of moving to different destinations (net differences). Female part-time employees, 20-54 years old (non-students), separated by voluntary/non-voluntary part-time workers

|                                         | To unemployment      |                        | To inactivity        |                        | To full-time work    |                        | To promotion         |                        |
|-----------------------------------------|----------------------|------------------------|----------------------|------------------------|----------------------|------------------------|----------------------|------------------------|
|                                         | Voluntary<br>(M17)   | Non-voluntary<br>(M18) | Voluntary<br>(M19)   | Non-voluntary<br>(M20) | Voluntary<br>(M21)   | Non-voluntary<br>(M22) | Voluntary<br>(M23)   | Non-voluntary<br>(M24) |
| <b>Native (ref.)</b>                    |                      |                        |                      |                        |                      |                        |                      |                        |
| Immigrant                               | 0.806***<br>(0.293)  | 0.310**<br>(0.138)     | 0.065<br>(0.274)     | 0.008<br>(0.189)       | -0.108<br>(0.309)    | -0.479***<br>(0.177)   | -0.123<br>(0.214)    | -0.154<br>(0.117)      |
| <b>Marginal part-time (ref.)</b>        |                      |                        |                      |                        |                      |                        |                      |                        |
| Short part-time                         | -0.326***<br>(0.085) | -0.408***<br>(0.041)   | -0.714***<br>(0.067) | -0.452***<br>(0.053)   | 0.653***<br>(0.092)  | 0.388***<br>(0.053)    | -0.224***<br>(0.057) | -0.286***<br>(0.034)   |
| Substantial part-time                   | -0.500***<br>(0.092) | -0.534***<br>(0.047)   | -1.012***<br>(0.075) | -0.589***<br>(0.063)   | 2.179***<br>(0.095)  | 1.571***<br>(0.056)    | 0.270***<br>(0.058)  | 0.099***<br>(0.037)    |
| <b>Native*Marginal part-time (ref.)</b> |                      |                        |                      |                        |                      |                        |                      |                        |
| Immigrant*Short part-time               | 0.161<br>(0.218)     | -0.194**<br>(0.094)    | 0.034<br>(0.206)     | 0.331**<br>(0.135)     | -0.276<br>(0.249)    | 0.217*<br>(0.119)      | -0.262<br>(0.164)    | -0.073<br>(0.077)      |
| Immigrant*Substantial part-time         | -0.346<br>(0.254)    | -0.175<br>(0.112)      | -0.212<br>(0.251)    | 0.322**<br>(0.163)     | -0.396<br>(0.248)    | 0.096<br>(0.124)       | -0.181<br>(0.169)    | -0.088<br>(0.084)      |
| Constant                                | -4.488***<br>(0.254) | -3.096***<br>(0.110)   | -2.820***<br>(0.194) | -3.184***<br>(0.153)   | -3.560***<br>(0.180) | -3.610***<br>(0.127)   | -1.610***<br>(0.127) | -1.885***<br>(0.085)   |
| Observations                            | 51,003               | 65,916                 | 51,003               | 65,916                 | 51,003               | 65,916                 | 51,003               | 65,916                 |
| Respondents                             | 25,110               | 33,203                 | 25,110               | 33,203                 | 25,110               | 33,203                 | 25,110               | 33,203                 |

Source: Data from the SLFS (I/2008-IV/2016), own calculations.

Note: Models controlled for age, nationality, period of observation, educational level, time in the Spanish labour market, labour status of the partner, children in the household, occupational attainment, sector of activity and type of contract.

\*\*\* p<0.01, \*\* p<0.05, \* p<0.1 (standard errors in parentheses).

**Table A7.** Resume of the main findings

|                   | PRECARIOUSNESS                                                                                     |                                                                                                | STEPPING STONE                                      |                                                                                                    |
|-------------------|----------------------------------------------------------------------------------------------------|------------------------------------------------------------------------------------------------|-----------------------------------------------------|----------------------------------------------------------------------------------------------------|
|                   | To unemployment                                                                                    | To inactivity                                                                                  | To full-time                                        | To promotion                                                                                       |
| GROSS differences | Larger migrant penalty at the top of the working time categories (amongst full-time employees)     | Larger migrant penalty at the top of the working time categories (amongst full-time employees) | Same migrant penalty across working time categories | Larger migrant penalty at the top of the working time categories (amongst substantial part-timers) |
| NET differences   | Larger migrant penalty at the bottom of the working time categories (amongst marginal part-timers) | No migrant disadvantage                                                                        | Same migrant penalty across working time categories | Larger migrant penalty at the top of the working time categories (amongst substantial part-timers) |



**Figure A1.** Average adjusted probabilities of moving to different destinations (net differences), separated by motherhood status and reason for working part-time work. Female employees, 20-54 years old (non-students)

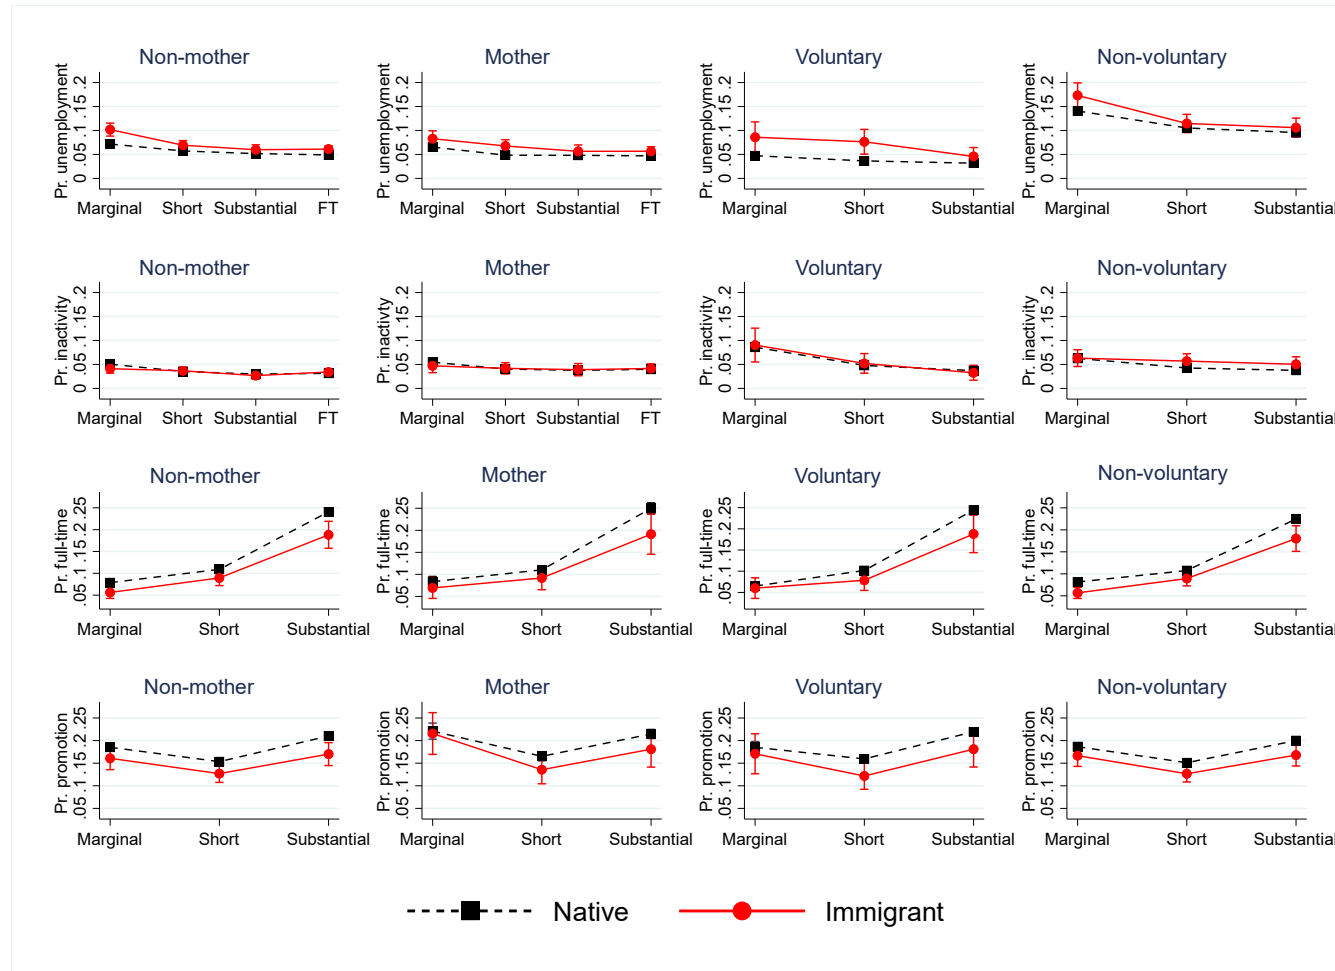

*Source:* Data from the SLFS (I/2008-IV/2016), own calculations.

*Note:* Average adjusted probabilities calculated from models in tables A5 and A6.
